# Supplementary material
Source: HighWire-hosted journal article supplement (http://www.cmaj.ca/highwire/filestream/58272/field_highwire_adjunct_files/3/cardiac-park-app_4.pdf)
Supplement: cardiac-park-app_4.pdf [file cardiac-park-app_4.pdf]

#### Appendix 4 (as supplied by the authors): Detailed table of characteristics of included studies

| Study                   | Trial Characteristics                                                                                                                                                 | Patient Characteristics                                                                                                                                                                              | Intervention                                                                                                                                                                                                                                                                                                                                                                                                                                                                                                    | Outcome                                                                                |
|-------------------------|-----------------------------------------------------------------------------------------------------------------------------------------------------------------------|------------------------------------------------------------------------------------------------------------------------------------------------------------------------------------------------------|-----------------------------------------------------------------------------------------------------------------------------------------------------------------------------------------------------------------------------------------------------------------------------------------------------------------------------------------------------------------------------------------------------------------------------------------------------------------------------------------------------------------|----------------------------------------------------------------------------------------|
| Lozano 2000             | N (Tx/Ctl): 109/113<br>Design: Crossover<br>Randomization: Post implantation<br>Allocation Concealment: Unclear<br>Blinding: NR; patients appeared to be blind.       | Age (mean, SD): 65 (10)<br>Male (%): 83<br>Ischemic CM (%): 68<br>NYHA Class I to IV (%): 0, 35, 57, 8<br>LVEF (mean, SD): 0.22 (0.007)<br>QRS (msec): NR<br>RBBB (%): NR<br>AF (%): NR              | Cardiac resynchronization therapy+implantable defibrillator+optimal medical therapy vs implantable defibrillator+optimal medical therapy<br><br>Cardiac resynchronization therapy+implantable defibrillator: implantable defibrillator capable of BV pacing. Atrial synchronous, ventricular pacing mode.<br><br>Optimal medical therapy: Was not specified part of study protocol. At enrolment 87% received ACE, or arbs, 83% diuretics, 66% digoxin 38% $\beta$ -blockers                                    | All cause mortality<br><br>Timepoint:<br>3 months                                      |
| MUSTIC<br>Cazeau 2001   | N (Tx/Ctl): 29/29<br>Design: Crossover<br>Randomization: Post implantation<br>Allocation Concealment: Unclear<br>Blinding: "single blind"                             | Age (mean, SD): 63 (10)<br>Male (%): 75<br>Ischemic CM (%): NR<br>NYHA Class I to IV (%): 0, 100, 0, 0<br>LVEF (mean, SD): NR<br>QRS (msec mean, SD): 176 (19)<br>RBBB (%): NR<br>AF (%): NR         | Cardiac resynchronization therapy+implantable defibrillator+optimal medical therapy vs implantable defibrillator+optimal medical therapy<br><br>Cardiac resynchronization therapy+implantable defibrillator: Triple output dual chamber devices (Chorum 7336 MSP ELA Medical, insync 8040 Medtronic). Basic rate 40 bpm, upper rate 85% of max heart rate.<br><br>Optimal medical therapy: Included at least diuretics and Ace inhibitors at maximal tolerated dose for at least one month before implantation. | Death<br><br>Timepoint:<br>End of first treatment period prior to crossover was 3 mos. |
| MIRACLE<br>Abraham 2002 | N (Tx/Ctl): 228/225<br>Design: Parallel group<br>Randomization: Post implantation<br>Allocation Concealment: Yes<br>Blinding: patients, treating physician, assessors | Age (mean, SD): 64 (11)<br>Male (%): 68<br>Ischemic CM (%): 54<br>NYHA Class I to IV (%): 0, 0, 90, 10<br>LVEF (mean%, SD): 21.7 (6.3)<br>QRS (msec mean, SD): 166 (20)<br>RBBB (%): NR<br>AF (%): 0 | Cardiac resynchronization therapy+optimal medical therapy vs optimal medical therapy<br><br>Cardiac resynchronization therapy: insync model 8040 Medtronic.<br><br>Optimal medical therapy: "conventional therapy for heart failure"                                                                                                                                                                                                                                                                            | Death<br><br>Timepoint:<br>6 months                                                    |

| Study                                                    | Trial Characteristics                                                                                                                                                                       | Patient Characteristics                                                                                                                                                                                           | Intervention                                                                                                                                                                                                                                                                                                                                                                                                                                                                                                                                                                                                                                                                                                                                                                            | Outcome                             |
|----------------------------------------------------------|---------------------------------------------------------------------------------------------------------------------------------------------------------------------------------------------|-------------------------------------------------------------------------------------------------------------------------------------------------------------------------------------------------------------------|-----------------------------------------------------------------------------------------------------------------------------------------------------------------------------------------------------------------------------------------------------------------------------------------------------------------------------------------------------------------------------------------------------------------------------------------------------------------------------------------------------------------------------------------------------------------------------------------------------------------------------------------------------------------------------------------------------------------------------------------------------------------------------------------|-------------------------------------|
| MIRACLE<br>implantable<br>defibrillator<br>Young 2003    | N (Tx/Ctl): 187/182<br>Design: Parallel group<br>Randomization: Post<br>implantation<br>Allocation Concealment: Yes<br>Blinding: Patients, treating<br>physicians and staff. (Others<br>NR) | Age (mean, SD): 67 (10)<br>Male (%): 77<br>Ischemic CM (%): Tx 75.8, Ctl 64.0<br>NYHA Class I to IV (%): 0, 0, 89, 11<br>LVEF (mean%, SD): 24 (6.2)<br>QRS (msec mean, SD): 163 (22)<br>RBBB (%): 13<br>AF (%): 0 | Cardiac resynchronization therapy+implantable<br>defibrillator+optimal medical therapy vs<br>implantable defibrillator+optimal medical therapy<br><br>Cardiac resynchronization therapy+implantable<br>defibrillator: Model 7272 insync implantable<br>defibrillator Medtronic to deliver BVP plus<br>implantable defibrillator. Programmed to pace<br>ventricles following atrial-sensed events at rates<br><130/min. Atrial pacing occurred only for sinus<br>rates < 35/min.<br><br>Optimal medical therapy: Stable and appropriate<br>drug regimen which included ACE or ARB if<br>tolerated for 1 month prior to implantation. If<br>taking a $\beta$ -blocker it had to have been initiated 3<br>mos prior to enrollment. Initiation of B-blockade<br>not permitted during trial. | Death<br><br>Timepoint:<br>6 months |
| MIRACLE<br>implantable<br>defibrillator2<br>Abraham 2004 | N (Tx/Ctl): 85/101<br>Design: Parallel group<br>Randomization: Post<br>implantation<br>Allocation Concealment: Yes<br>Blinding: Patients, treating<br>physicians and staff. (Others<br>NR)  | Age (mean, SD): 63 (12.4)<br>Male (%): 89<br>Ischemic CM (%): 57<br>NYHA Class I to IV (%): 0, 100, 0, 0<br>LVEF (mean%, SD): 24.5 (6.7)<br>QRS (msec mean, SD): 165 (24)<br>RBBB (%): 16%<br>AF (%): NR          | Cardiac resynchronization therapy+implantable<br>defibrillator+optimal medical therapy vs<br>implantable defibrillator+optimal medical therapy<br><br>Cardiac resynchronization therapy+implantable<br>defibrillator: Model 7272 insync implantable<br>defibrillator Medtronic to deliver BVP plus<br>implantable defibrillator. Programmed to pace<br>ventricles following atrial-sensed events at rates<br><130/min. Atrial pacing occurred only for sinus<br>rates < 35/min.<br><br>Optimal medical therapy: All appropriate<br>treatments for heart failure which included a<br>diuretic an ACE or ARB and usually digitalis and a<br>$\beta$ -blocker. Patients were stable on meds for one<br>month ( $\beta$ -blocker for 3 mos) before implantation.                            | Death<br><br>Timepoint:<br>6 months |

| Study                     | Trial Characteristics                                                                                                                                                                                                                                                                                         | Patient Characteristics                                                                                                                                                                                           | Intervention                                                                                                                                                                                                                                                                                                                                                                                                                                                                                                                                                                                                                                                | Outcome                                                                                                                                                                                                                                                                                                         |
|---------------------------|---------------------------------------------------------------------------------------------------------------------------------------------------------------------------------------------------------------------------------------------------------------------------------------------------------------|-------------------------------------------------------------------------------------------------------------------------------------------------------------------------------------------------------------------|-------------------------------------------------------------------------------------------------------------------------------------------------------------------------------------------------------------------------------------------------------------------------------------------------------------------------------------------------------------------------------------------------------------------------------------------------------------------------------------------------------------------------------------------------------------------------------------------------------------------------------------------------------------|-----------------------------------------------------------------------------------------------------------------------------------------------------------------------------------------------------------------------------------------------------------------------------------------------------------------|
| COMPANION<br>Bristow 2004 | N (Tx/Tx/Ctl):617/595/308<br>Design: Parallel group<br>Randomization: Pre implantation<br>Allocation Concealment: Unclear<br>Blinding: Endpoint committee, steering committee and sponsor. (patients, physicians, statisticians, data management group and data safety and monitoring board were not blinded) | Age (mean): 67<br>Male (%): 67<br>Ischemic CM (%): 55<br>NYHA Class I to IV (%): 0, 0, 86, 14<br>LVEF (mean): 0.22<br>QRS (msec mean): 160<br>RBBB (%): 10<br>AF %: NR                                            | Cardiac resynchronization therapy+optimal medical therapy vs optimal medical therapy<br>Cardiac resynchronization therapy+implantable defibrillator+optimal medical therapy vs optimal medical therapy<br><br>Cardiac resynchronization therapy: Contak TR model 1241, Guidant<br><br>Cardiac resynchronization therapy+implantable defibrillator: Contak CD model 1823 Guidant. Both devices set at VDD with rate well below patient's lowest heart rate.<br><br>Optimal medical therapy - Diuretics, ACE inhibitors, beta-blockers, spironolactone. All subject to tolerance and contraindication. Other meds could be used at investigator's discretion. | Death rate from any cause<br><br>Timepoint:<br>12 months for rates.<br>(potentially up to 1080 days for raw data)<br>Median duration of follow-up:<br>Optimal medical therapy 14.8 months; cardiac resynchronization therapy 16.5 months; cardiac resynchronization therapy+implantable defibrillator 16 months |
| CARE-HF<br>Cleland 2005   | N (Tx/Ctl): 409/404<br>Design: Parallel group<br>Randomization: Pre implantation<br>Allocation Concealment: Unclear<br>Blinding: Endpoint committee. (patients and treating physicians were not blind.)                                                                                                       | Age: (median, IQR) 66 (59-72)<br>Male (%): 74<br>Ischemic CM (%): 38<br>NYHA Class I to IV (%): 0, 0, 93, 7<br>LVEF: (median, IQR) 25 (22-29)<br>QRS (msec median, IQR): 160 (152-180)<br>RBBB (%): NR<br>AF %: 0 | Cardiac resynchronization therapy+optimal medical therapy vs optimal medical therapy<br><br>Cardiac resynchronization therapy: Medtronic insync or In Sync III device. Atrial based BVP. 60 beats/min.<br><br>Optimal medical therapy: "standard medical therapy"                                                                                                                                                                                                                                                                                                                                                                                           | Death from any cause<br><br>Timepoint:<br>Mean 29.4 months (range 18-44.7)                                                                                                                                                                                                                                      |
| REVERSE<br>Linde 2008     | N (Tx/Ctl): 419/191<br>Design: Parallel group<br>Randomization: Post implantation<br>Allocation Concealment: Unclear<br>Blinding: Patients, treating physicians, assessors were blind (electrophysiologist, echocardiographer and data monitors were unblinded)                                               | Age (mean, SD): 62 (11)<br>Male (%): 79<br>Ischemic CM (%): 55<br>NYHA Class I to IV (%): 18, 82, 0, 0<br>LVEF (mean%, SD): 27 (7)<br>QRS (msec mean, SD): 153 (12)<br>RBBB (%): NR<br>AF (%): 0 (excluded)       | Cardiac resynchronization therapy+optimal medical therapy vs optimal medical therapy<br><br>Cardiac resynchronization therapy: cardiac resynchronization therapy system with (83%) or without (17%) implantable defibrillator capabilities.<br><br>Optimal medical therapy: ACE or ARB and $\beta$ -blocker for at least 3 mos before enrolment.                                                                                                                                                                                                                                                                                                            | Death<br><br>Timepoint:<br>12 months                                                                                                                                                                                                                                                                            |

| Study                                                | Trial Characteristics                                                                                                                                            | Patient Characteristics                                                                                                                                                                                                   | Intervention                                                                                                                                                                                                                                                                                                                                                                                                                                                                                                                                                                                       | Outcome                                                                                                                                                    |
|------------------------------------------------------|------------------------------------------------------------------------------------------------------------------------------------------------------------------|---------------------------------------------------------------------------------------------------------------------------------------------------------------------------------------------------------------------------|----------------------------------------------------------------------------------------------------------------------------------------------------------------------------------------------------------------------------------------------------------------------------------------------------------------------------------------------------------------------------------------------------------------------------------------------------------------------------------------------------------------------------------------------------------------------------------------------------|------------------------------------------------------------------------------------------------------------------------------------------------------------|
| RHYTHM implantable defibrillator<br>FDA report 2004  | N (Tx/Ctl): 119/59<br>Design: Parallel group<br>Randomization: Post implantation<br>Allocation Concealment: Unclear<br>Blinding: “double blind”                  | Age (mean, SD): NR<br>Male (%): NR<br>Ischemic CM (%): NR<br>NYHA Class I to IV (%): 2, 6, 87, 6<br>LVEF (mean%, SD): 24.8 (7.7).<br>QRS (msec mean): 168<br>RBBB (%): NR<br>AF (%): 0                                    | Cardiac resynchronization therapy+implantable defibrillator+optimal medical therapy vs implantable defibrillator+optimal medical therapy<br><br>Cardiac resynchronization therapy+implantable defibrillator: Epic HF V 338 implantable defibrillator system<br><br>Optimal medical therapy: Included ACE inhibitor and $\beta$ -blocker 30 days prior to enrolment                                                                                                                                                                                                                                 | "Expired"<br><br>Timepoint:<br>12.1 (3.4) months, range 0.3 to 20.3)<br>Mortality data available for both 6 months and beyond.                             |
| Vector<br>FDA report 2005                            | N (Tx/Ctl): 59/47<br>Design: Parallel group<br>Randomization: Post implantation<br>Allocation Concealment: Unclear<br>Blinding: “double blind”                   | Age (mean, SD): 67.1 (9.7)<br>Male (%): 62.5<br>Ischemic CM (%): NR<br>NYHA Class I to IV (%): 0, 29, 65, 6<br>LVEF (mean%, SD): NR<br>QRS (msec): NR<br>RBBB (%): NR<br>AF (%): 0                                        | Cardiac resynchronization therapy+optimal medical therapy vs optimal medical therapy<br><br>Cardiac resynchronization therapy: Frontier Model 5508<br><br>Optimal medical therapy: Not specified.                                                                                                                                                                                                                                                                                                                                                                                                  | Death<br><br>Timepoint:<br>6 months (data reported beyond 6 months was not broken down by group)<br>Mean followup 19.9 (8.9) months, range 0.8-35.4 months |
| MADIT-cardiac resynchronization therapy<br>Moss 2009 | N (Tx/Ctl): 1089/731<br>Design: Parallel group<br>Randomization: Pre implantation<br>Allocation Concealment: Unclear<br>Blinding: Endpoint committee (others NR) | Age (mean, SD): 65 (11)<br>Male (%): 75<br>Ischemic CM (%): 55<br>NYHA Class I to IV (%): 15, 85, 0, 0<br>LVEF (mean, SD): 0.24 (0.05)<br>QRS (% > 150 msec): 65<br>RBBB (%): 12.5<br>AF (% > 1 mo before enrolment) 11.5 | Cardiac resynchronization therapy+implantable defibrillator+optimal medical therapy vs implantable defibrillator+optimal medical therapy<br><br>Commercially available Boston Scientific devices were used.<br><br>Cardiac resynchronization therapy+implantable defibrillator: programmed for DDD with a lower rate of 40bpm and hysteresis off.<br><br>Implantable defibrillator only: pacing mode was VVI for single-chamber units and DDI for dual-chamber with lower rates of 40 bpm and hysteresis off in both single and dual-chamber units.<br><br>Optimal medical therapy: not described. | Timepoint:<br><br>Death at any time<br><br>Timepoint:<br>Mean follow up 2.4 years                                                                          |

| Study             | Trial Characteristics                                                                                                                                                                                                                                                                                                                            | Patient Characteristics                                                                                                                                                                              | Intervention                                                                                                                                                                                                                                                                                                                                                                                                                                                                 | Outcome                                                                 |
|-------------------|--------------------------------------------------------------------------------------------------------------------------------------------------------------------------------------------------------------------------------------------------------------------------------------------------------------------------------------------------|------------------------------------------------------------------------------------------------------------------------------------------------------------------------------------------------------|------------------------------------------------------------------------------------------------------------------------------------------------------------------------------------------------------------------------------------------------------------------------------------------------------------------------------------------------------------------------------------------------------------------------------------------------------------------------------|-------------------------------------------------------------------------|
| RAFT<br>Tang 2010 | N (Tx/Ctl): 894/904<br>Design: Parallel group<br>Randomization: Pre implantation<br>Allocation Concealment: Yes<br>Blinding: Patients, health care providers, heart failure management team who reported clinical events, adjudication committee, were blinded. Arrhythmia team that performed device implantation and management was not blind. | Age (mean, SD): 66.1 (9.3)<br>Male (%): 83<br>Ischemic CM (%): 67<br>NYHA Class I to IV (%): 0, 80, 20, 0<br>LVEF (mean, SD): 22.6 (5.2)<br>QRS (mean msec): 158 (24)<br>RBBB (%): 9<br>AF (%): 12.8 | Cardiac resynchronization therapy+implantable defibrillator+optimal medical therapy vs implantable defibrillator+optimal medical therapy<br><br>Medtronic device was programmed to minimize ventricular pacing in the ICD group and maximize ventricular pacing in the ICD-CRT group as well as provide uniform arrhythmia detection and therapy.<br><br>Optimal medical therapy: Beta blocker, ACE inhibitor or ARB, spironolactone, aspirin and statins, when appropriate. | Death from any cause<br><br>Timepoint:<br>Mean follow up 40 (20) months |
